# Supplementary material for: Rice Breeding for High Grain Yield under Drought: A Strategic Solution to a Complex Problem
Source: Hindawi journal article supplement (doi:10.1155/2014/863683), 2014-01-01
Supplement: f1 [file 863683.f1.pdf]

Supplementary Table 1: Literature review and reference citations of studies targeting different classes of traits related to drought tolerance in rice. (Source: Kamoshita et al. 2008)

| Population |               | Phenotyping environment                  | Measured or mapped traits |           |                                      |                    |                          | Reference                |
|------------|---------------|------------------------------------------|---------------------------|-----------|--------------------------------------|--------------------|--------------------------|--------------------------|
|            |               |                                          | Plant-type                | Phenology | Primary                              | Secondary          | Yield and integrative    |                          |
| 1          | CT/IR 100,154 | Upland (Si), lowland (W, Si)             | -                         | -         | -                                    | CT, DRS, DS,LD, LR | GY, BY, GW, PSS          | Zhang et al. (1999)      |
|            | CT/IR 104     | Upland (S)                               | -                         | -         | CMS                                  | -                  | -                        | Tripathy et al. (2000)   |
|            | CT/IR 154     | Upland (S, hardpan)                      | -                         | -         | OA, PRL, PRT, PRW, RPI, RT, RPF, TRW | -                  | -                        | Zhang et al. (2001a)     |
|            | CT/IR 154     | Lowland (W, seedling stage)              | -                         | -         | DR%, DRW, DRW-T, RD, RT              | -                  | SDW                      | Kamoshita et al. (2002a) |
|            | CT/IR n.a.    | Upland (W)                               | PH, TN, TPL               | -         | RN, RSLR, TRW                        | -                  | -                        | Kanbar et al. (2002)     |
|            | CT/IR 154     | Upland (W, Si, St;2 wet & 1 dryseasons)  | -                         | -         | -                                    | LR, LD, RWC        | GY, BY, HI, SN           | Babu et al. (2003)       |
|            | CT/IR 154     | Lowland (W, Si, St;wet season)           | PN                        | -         | -                                    | -                  | GY, BY, SN, PSS, GW      | Lanceras et al. (2004)   |
|            | CT/IR n.a.    | Upland (W, S)                            | PH, PL, PTN               | DH        | EW                                   | CT, LD, LR, RWC    | GY, BY, HI, SY           | Srinivasan (2005)        |
|            | CT/IR 105     | Lowland (W, St;2 years)                  | -                         | DH        | RPF, TRW                             |                    | GY, BY, DFT,HI, PSS, SDW | Kumar et al. (2007)      |
| 2          | Co/Mo 203     | Upland (W), Upland (S; 3)                | -                         | -         | DRW-T, MRL, RSDR,RT, TRW,            | LR                 | -                        | Champoux et al. (1995)   |
|            | Co/Mo 202     | Upland (W,hardpan)                       | -                         | -         | PRN, RN, RPI                         | -                  | -                        | Ray et al. (1996)        |
|            | Co/Mo 42      | Upland (S)                               | -                         | -         | DT, OA                               | RWC                | -                        | Lilley et al. (1996)     |
| 3          | IR/Az 105     | Upland (W)                               | -                         | -         | DRSR, DRW, DRW-T, MRL, RT, TRW       | -                  | -                        | Yadav et al. (1997)      |
|            | IR/Az 85-105  | Upland (S; 3 sites/seasons)              | -                         | -         | -                                    | LD, LR, RWC        | RGR                      | Courtois et al. (2000)   |
|            | IR/Az 56      | Upland (W, S (mild vegetative))          | PH, TN                    | -         | MRL, RL, RN, RSDR, RT, TRW, TRW-T    | -                  | SDW                      | Hemamalini et al. (2000) |
|            | IR/Az 109     | Upland (W, hardpan)                      | -                         | -         | PRN, PRT, RN, RPI                    | -                  | -                        | Zheng et al. (2000)      |
|            | IR/Az 90      | Lowland (W), upland (Si), uplandp (W, S) | PL, PTN, TN               | DH, DM    | MRL, RN, RSDR, RT, RV, TRW           | -                  | GY, SDW, SY              | Venuprasad et al. (2002) |
|            | IR/Az 85      | Upland (W, S (flowering); 3 dry seasons) | PH, PN                    | DH        | -                                    | -                  | GY, RGY, GP, GW, PSS, SN | Lafitte et al. (2002b)   |

|    |               |                                                          |       |    |                                     |                     |                                   |                             |                        |
|----|---------------|----------------------------------------------------------|-------|----|-------------------------------------|---------------------|-----------------------------------|-----------------------------|------------------------|
| 4  | Ba/Az 178     | Lowland                                                  | -     | -  | MRL, RCL, RT                        | -                   | -                                 | Price and Tomos (1997)      |                        |
|    | Ba/Az 178     | Upland                                                   |       | DH | -                                   | MLRS, RSC, SR, TFSC | -                                 | Price et al. (1997)         |                        |
|    | Ba/Az n.a.    | Upland                                                   | -     | -  | RL                                  | -                   | -                                 | Price and Courtois (1999)   |                        |
|    | Ba/Az 104     | Upland                                                   | -     | -  | PRN, RN, RPI                        | -                   | -                                 | Price et al. (2000)         |                        |
|    | Ba/Az 110-176 | Upland (S; 2 sites in 3 dry seasons)                     | -     | -  | -                                   | LD, LR, RWC         | -                                 | Price et al. (2002d)        |                        |
|    | Ba/Az 140     | Upland (S; 2 seedling drought)                           | -     | -  | DRN, DRW, MRL, RSDR, RT, TRW        | -                   | -                                 | Price et al. (2002b)        |                        |
|    | Ba/Az n.a.    | Upland (W; 2 dry seasons)                                | -     | -  | d <sup>13</sup> C, SLA              | -                   | -                                 | Price et al. (2002c)        |                        |
|    | Ba/Az 96      | Upland (W, Si (flowering); 2 dry seasons)                | H, PN | P  | DH                                  | -                   | LD, LR, RWC                       | GY, BY, FSP, GP, GW, HI, SF | Lafitte et al. (2004b) |
|    | Ba/Az 177     | Upland                                                   | H, PL | P  | DH                                  | -                   | LD, LR                            | GY, SY                      | Gomez et al. (2005)    |
|    | Ba/Az 168     | Upland (W, S)                                            | H     | P  | -                                   | MRL, RT, DRW        | SDW                               | MacMillan et al. (2006)     |                        |
| 5  | IR/IR 166     | Upland (W, hardpan)                                      | -     | -  | PRL, PRN, RPI, PRT, RN              | -                   | -                                 | Ali et al. (2000)           |                        |
|    | IR/IR 166     | Lowland (W; seedling stage)                              | -     | -  | DR%, DRW, DRW-T, RD, RT             | -                   | SDW                               | Kamoshita et al. (2002b)    |                        |
| 6  | IA/Co 125     | Upland (W)                                               | H, TN | P  | DRSR, DRW, DRW-T,MRL, RT, TRW       | -                   | SDW                               | Courtois et al. (2003)      |                        |
| 7  | I/I 150       | Upland (S)                                               | -     | -  | OA                                  | -                   | -                                 | Robin et al. (2003)         |                        |
| 8  | I/A 150       | Lowland (W), upland (W)                                  | -     | -  | SRL                                 | -                   | -                                 | Zhang et al. (2001b)        |                        |
|    | I/A 96        | Lowland (W), upland (S; mild)                            | -     | -  | ARN, LRL, LRN, SRL                  | -                   | -                                 | Zheng et al. (2003)         |                        |
| 9  | I/Yu 116      | Lowland (W), upland (Sv), uplandp (Sv)                   | -     | -  | MRL, RN, RSDR, RSFR, RT, TRFW, TRW  | -                   | GY, IDR                           | Li et al. (2005)            |                        |
| 10 | Z/I 180       | Lowland (W, Si (reproductive); 2 soils), uplandp (W, St) | -     | -  | DRV, MRD, RGV, RT                   | CT, LD, LR          | DFT, DRI, RGY, RSF                | Yue et al. (2005)           |                        |
|    | Z/I 150       | Upland (W, Si (flowering))                               | -     | -  | DIRD, DIDRV, DRV, MRD, RGD, RGV, RV | DLR, LD             | RGY, RBY, RFP, RGW, RHI, RSF, RSN | Yue et al. (2006)           |                        |

|    |          |                                        |                 |   |    |               |                      |                       |                        |
|----|----------|----------------------------------------|-----------------|---|----|---------------|----------------------|-----------------------|------------------------|
|    | Z/I 187  | Upland (W, Si)                         | N               | P | -  | -             | -                    | GY, GP, GW, SF        | Zou et al. (2005)      |
|    | Z/I 187  | Upland (W, Si<br>(reproductive stage)) | L, PN           | P | -  | -             | -                    | GP, PBN, PND, SBN, SN | Liu et al. (2008)      |
| 11 | T/L 254  | Lowland (W, St; dry season)            | H, PN           | P | DH | -             | -                    | GY, GW                | Xu et al. (2005)       |
| 12 | I/N n.a. | Upland (W, S)                          | H, TN           | P | DH | RT            | CT, DRS, LD, LR, RWC | BY                    | Boopathi et al. (2005) |
|    | I/N n.a. | Upland (W, S)                          | H, PL, TN<br>DH | P | -  | -             | CT, DRS, LD, LR, RWC | GY, BY, HI, SY        | Beena (2005)           |
| 13 | A/I 106  | Lowland (W, S)                         | -               | - | -  | -             | -                    | RGR, WUE              | Kato et al. (2008)     |
|    | A/I 106  | Lowland (W)                            | -               | - | -  | BI, RAL, TRW  | -                    | -                     | Horii et al. (2006)    |
| 14 | O/Y 98   | Lowland (W, S)                         | H, PN           | P | -  | RA, RSDR, TRW | -                    | SDW, SPDW             | Ikeda et al. (2007)    |
| 15 | V/W 436  | Upland (W, S in 2 dry seasons)         | H, PN           | P | DH | -             | -                    | GY, DFT, DRI, HI, BY  | Bernier et al. (2007)  |

(1) Plant-type traits contain plant height (PH), panicle length (PL), panicle number (PN), productive tiller number (PTN), tiller number (TN), and total plant length (TPL).

(2) Phenology contains days to heading/flowering (DH), and days to maturity (DM).

(3) Primary traits contain (3a) constitutive root traits and (3b) other induced traits.

(3a) Constitutive root traits are total root weight (TRW), total root fresh weight (TRFW), root to shoot dry weight ratio (RSDR), root to shoot fresh weight ratio (RSFR), deep root weight (DRW), deep root to total root dry weight ratio (DR%), deep root weight per tiller (DRW-T), deep root number (DRN), deep root to shoot dry weight ratio (DRSR), rooting depth (RD), root length (RL), maximum root length (MRL), total root number (RN), root shoot length ratio (RSLR), adventitious root number (ARN), lateral root number (LRN), lateral root length (LRL), seminal root length (SRL), root thickness at different depth (RT), root cell length (RCL), maximum root depth (cm) (MRD), root volume (RV), deep root rate (%) in volume (DRV), root growth rate in depth (cm/day) (RGD), root growth rate in volume (ml/day) (RGV), root pulling force (RPF), root axis length (RAL), branching index (BI), new root number (NRN), maximum new root length (MNRL), rooting ability after transplanting (RA).

(3b) Other primary induced traits are drought induced root growth in depth (cm) (DIRD), deep root rate in volume (%) induced by drought (DIDRV), penetrated root number (PRN), penetrated root thickness (PRT), root penetration index (RPI), penetrated root weight (PRW), penetrated root length (PRL), osmotic adjustment (OA), cell membrane stability (CMS), carbon isotope discrimination as water use efficiency (d13C), specific leaf area (SLA), dehydration tolerance (DT).

(4) Secondary traits contain modified leaf rolling score (MLRS), leaf rolling (LR), number of days to leaf rolling (DLR), leaf drying (LD), drought score (DS), drought recovery score (DRS), relative water content (RWC), canopy temperature (CT), stomatal resistance (SR), rate of stomatal closure (RSC), time of fastest stomatal closure (TFSC).

(5) Grain yield (GY) and integrative traits contain straw yield (SY), biomass yield (BY), delay in flowering time by drought (DFT), primary and secondary branch number in panicles (PBN, SBN), panicle neck diameter (PND), spikelet number (SN), percent spikelet sterility (PSS), fraction sterile panicle (FSP), grains per panicle (GP), spikelet fertility (SF), 1000-grain weight (GW), harvest index (HI), shoot dry weight (SDW), single panicle dry weight (SPDW), water use efficiency (WUE), relative grain yield (RGY), relative growth rate (RGR), relative spikelet fertility (RSF), relative biomass (RBY), relative rate of fertile panicle (RFP), relative harvest index (RHI), relative grain weight (RGW), relative number of spikelets per panicle (RSN), panicle harvest index (PHI), drought response index (DRI), index of drought resistance (IDR).

- Ali, M.L., Pathan, M.S., Zhang, J., Bai, G., Sarkarung, S., Nguyen, H.T., 2000. Mapping QTLs for root traits in a recombinant inbred population from two indica ecotypes in rice. *Theoretical Applied Genetics* 101, 756–766.
- Babu, R.C., Nguyen, B.D., Chamarerk, V., Shanmugasundaram, P., Chezian, P., Jeyaprakash, P., Ganesh, S.K., Palchamy, A., Sadasivam, S., Sarkarung, S., Wade, L.J., Nguyen, H.T., 2003. Genetic analysis of drought resistance in rice by molecular markers: association between secondary traits and field performance. *Crop Science* 43, 1457–1469.
- Beena, 2005. Studies on physio-morphological traits and genetic markers associated with drought response in rice (*O. sativa*). PhD thesis. Tamil Nadu Agricultural University, Coimbatore, India.
- Bernier, J., Kumar, A., Ramaiah, V., Spaner, D., Atlin, G., 2007. A large-effect QTL for grain yield under reproductive-stage drought stress in upland rice. *Crop Science* 47, 507–518.
- Boopathi, N.M., Chezian, P., Jeyaprakash, P., Satheesh Kumar, S., Gomez, M., Suresh, R., Atlin, G., Subudhi, P.K., Shanmugasundaram, P., Babu, R.C., 2005. QTL mapping of drought-resistance traits using indica rice (*Oryza sativa* L.) lines adapted to target population of environment. In: *Proceedings of the 2nd International Conference on Integrated Approaches to Sustain and Improve Plant Production under Drought Stress*. University of Rome, “La Sapienza”, Rome, Italy, September 24–28 P6.05.
- Champoux, M.C., Wang, G., Sarkarung, S., Mackill, D.J., O’Toole, J.C., Huang, N., McCouch, S.R., 1995. Locating genes associated with root morphology and drought avoidance in rice via linkage to molecular markers. *Theoretical Applied Genetics* 90, 969–981.
- Courtois, B., McLaren, G., Sinha, P.K., Prasad, K., Yadav, R., Shen, L., 2000. Mapping QTLs associated with drought avoidance in upland rice. *Molecular Breeding* 6, 55–66.
- Courtois, B., Shen, L., Petalcorin, W., Carandang, S., Mauleon, R., Li, Z., 2003. Locating QTLs controlling constitutive root traits in the rice population IAC165 Co39. *Euphytica* 134, 335–345.
- Gomez, M., Babu, R.C., Shanmugasundaram, P., Satheesh Kumar, R., Suresh, R., Biji, K.R., Boopathi, N.M., Jeyaprakash, P., Gurumurthy, S., Price, A.H., 2005. QTL mapping and marker assisted selection for drought tolerance in rice (*Oryza sativa* L.). In: *Proceedings of the 2nd International Conference on Integrated Approaches to Sustain and Improve Plant Production under Drought Stress*. University of Rome, “La Sapienza”, Rome, Italy, September 24–28 P6.19.
- Hemamalini, G.S., Sashidhar, H.E., Hittalmani, S., 2000. Molecular marker assisted tagging of morphological and physiological traits under two contrasting moisture regimes at peak vegetative stage in rice (*Oryza sativa* L.). *Euphytica* 112, 1–10.
- Horii, H., Nemoto, K., Miyamoto, N., Harada, J., 2006. Quantitative trait loci for adventitious and lateral roots in rice (*Oryza sativa* L.). *Plant Breeding* 125, 198–200.
- Ikeda, H., Kamoshita, A., Manabe, T., 2007. Genetic analysis of rooting ability of transplanted rice (*Oryza sativa* L.) under different water conditions. *Journal of Experimental Botany* 58, 309–318.
- Kamoshita, A., Wade, L.J., Ali, M.L., Pathan, M.S., Zhang, J., Sarkarung, S., Nguyen, H.T., 2002b. Mapping QTLs for root morphology of a rice population adapted to rainfed lowland conditions. *Theoretical Applied Genetics* 104, 880–893.
- Kamoshita, A., Zhang, J., Siopongco, J., Sarkarung, S., Nguyen, H.T., Wade, L.J., 2002a. Effects of phenotyping environment on identification of QTL for rice root morphology under anaerobic conditions. *Crop Science* 42, 255–265.
- Kanbar, A., Shashidhar, H.E., Hittalmani, S., 2002. Mapping QTL associated with root and related traits in DH population of rice. *Indian Journal of Genetics* 62, 287–290.

- Kato, Y., Hirotsu, S., Nemoto, K., Yamagishi, J., 2008. Identification of QTLs controlling rice drought tolerance at seedling stage in hydroponic culture. *Euphytica* 160, 423–430.
- Kumar, R., Venuprasad, R., Atlin, G.N., 2007. Genetic analysis of rainfed lowland rice drought tolerance under naturally-occurring stress in eastern India: heritability and QTL effects. *Field Crops Research* 103, 42–52.
- Lafitte, H.R., Price, A.H., Courtois, B., 2004b. Yield response to water deficit in an upland rice mapping population: associations among traits and genetic markers. *Theoretical Applied Genetics* 109, 1237–1246.
- Lafitte, R., Courtois, B., Arrauddau, M., 2002b. Genetic improvement of rice in aerobic systems: progress from yield to genes. *Field Crops Research* 75, 171–190.
- Lanceras, J.C., Pantuwan, G., Jongdee, B., Toojinda, T., 2004. Quantitative trait loci associated with drought tolerance at reproductive stage in rice. *Plant Physiology* 135, 384–399.
- Li, Z., Mu, P., Li, C., Zhang, H., Li, Z., Gao, Y., Wang, X., 2005. QTL mapping of root traits in a doubled haploid population from a cross between upland and lowland japonica rice in three environments. *Theoretical Applied Genetics* 110, 1244–1252.
- Lilley, J., Ludlow, M., McCouch, S., O'Toole, J.C., 1996. Locating QTL for osmotic adjustment and dehydration tolerance in rice. *Journal of Experimental Botany* 47, 1427–1436.
- Liu, G., Mei, H.W., Yu, X.Q., Zou, G.H., Liu, H.Y., Hu, S.P., Li, M.S., Wu, J.H., Chen, L., Luo, L.J., 2008. QTL analysis of panicle neck diameter, a trait highly correlated with panicle size, under well-watered and drought conditions in rice (*Oryza sativa* L.). *Plant Science* 174, 71–77.
- MacMillan, K., Emrich, K., Piepho, H.P., Mullins, C.E., Price, A.H., 2006. Assessing the importance of genotype environment interaction for root traits in rice using a mapping population. II. Conventional QTL analysis. *Theoretical Applied Genetics* 113, 953–964.
- Price, A.H., Cairns, J.E., Horton, P., Jones, H.G., Griffiths, H., 2002c. Linking drought resistance mechanisms to drought avoidance in upland rice using a QTL approach: progress and new opportunities to integrate stomatal and mesophyll responses. *Journal of Experimental Botany* 53, 989–1004.
- Price, A.H., Courtois, B., 1999. Mapping QTLs associated with drought resistance in rice: progress, problems and prospects. *Plant Growth Regulation* 29, 123–133.
- Price, A.H., Steele, K.A., Moore, B.J., Barraclough, P.B., Clark, L.J., 2000. A combined RFLP and AFLP linkage map of upland rice (*Oryza sativa* L.) used to identify QTLs for root-penetration ability. *Theoretical Applied Genetics* 100, 49–56.
- Price, A.H., Steele, K.A., Moore, B.J., Jones, R.G.W., 2002b. Upland rice grown in soil filled chambers and exposed to contrasting water-deficit regimes. II. Mapping quantitative trait loci for root morphology and distribution. *Field Crops Research* 76, 25–43.
- Price, A.H., Tomos, A.D., 1997. Genetic dissection of root growth in rice (*Oryza sativa* L.). II. Mapping quantitative trait loci using molecular markers. *Theoretical Applied Genetics* 95, 143–152.
- Price, A.H., Townend, J., Jones, M.P., Audebert, A., Courtois, B., 2002d. Mapping QTLs associated with drought avoidance in upland rice grown in the Philippines and West Africa. *Plant Molecular Biology* 48, 683–695.
- Price, A.H., Young, E.M., Tomos, A.D., 1997. Quantitative trait loci associated with stomatal conductance, leaf rolling and heading date mapped in upland rice (*Oryza sativa*). *New Phytologist* 137, 83–91.
- Ray, J.D., Yu, L., McCouch, S.R., Champoux, M.C., Wang, G., Nguyen, H.T., 1996. Mapping quantitative trait loci associated with root penetration ability in rice. *Theoretical Applied Genetics* 92, 627–636.

- Robin, S., Pathan, M.S., Courtois, B., Lafitte, R., Carandang, S., Lanceras, S., Amante, M., Nguyen, H.T., Li, Z., 2003. Mapping osmotic adjustment in an advanced backcross inbred population of rice. *Theoretical Applied Genetics* 107, 1288–1296.
- Srinivasan, S., 2005. Studies on mapping QTLs linked to leaf epicuticular wax, physio-morphological and plant production traits under water stress and non-stress conditions in rice (*Oryza sativa* L.). PhD Thesis. Submitted to Tamil Nadu Agricultural University, Coimbatore, India.
- Tripathy, J.N., Zhang, J., Robin, S., Nguyen, T.T., Nguyen, H.T., 2000. QTLs for cell membrane stability mapped in rice (*Oryza sativa* L.) under drought stress. *Theoretical Applied Genetics* 100, 1197–1202.
- Venuprasad, R., Shashidhar, H.E., Hittalmani, S., Hemamalini, G.S., 2002. Tagging quantitative trait loci associated with grain yield and root morphological traits in rice (*Oryza sativa* L.) under contrasting moisture regimes. *Euphytica* 128, 293–300.
- Xu, J.L., Lafitte, H.R., Gao, Y.M., Fu, B.Y., Torres, R., Li, Z.K., 2005. QTLs for drought escape and tolerance identified in a set of random introgression lines of rice. *Theoretical Applied Genetics* 111, 1642–1650.
- Yadav, R., Courtois, B., Huang, N., McLaren, G., 1997. Mapping genes controlling root morphology and root distribution in a doubled-haploid population of rice. *Theoretical Applied Genetics* 94, 619–632.
- Yue, B., Xiong, L., Xue, W., Xing, Y., Luo, L., Xu, C., 2005. Genetic analysis for drought resistance of rice at reproductive stage in field with different types of soil. *Theoretical Applied Genetics* 111, 1127–1136.
- Yue, B., Xue, W., Xiong, L., Yu, Z., Luo, L., Cui, K., Jin, D., Xing, Y., Zhang, Q., 2006. Genetic basis of drought resistance at reproductive stage in rice: separation of drought resistance from drought avoidance. *Genetics* 172, 1213–1228.
- Zhang, J., Babu, R.C., Pantuwan, G., Kamoshita, A., Blum, A., Wade, L.J., Sarkarung, S., O'Toole, J.C., Nguyen, H.T., 1999. Molecular dissection of drought tolerance in rice: from physio-morphological traits to field performance. In: Ito, O., O'Toole, J., Hardy, B. (Eds.), *Genetic Improvement of Rice for Water-limited Environments. Proceedings of the Workshop on Genetic Improvement of Rice for Water-limited Environments*, International Rice Research Institute, Los Banos, Philippines, December 1–3, 1998, pp. 331–343.
- Zhang, J., Zheng, H.G., Aarti, A., Pantuwan, G., Nguyen, T.T., Tripathy, J.N., Sarial, A.K., Robin, S., Babu, R.C., Nguyen, B.D., Sarkarung, S., Blum, A., Nguyen, H.T., 2001a. Locating genomic regions associated with components of drought resistance in rice: comparative mapping within and across species. *Theoretical Applied Genetics* 103, 19–29.
- Zhang, W.P., Shen, X.Y., Wu, P., Hu, B., Liao, C.Y., 2001b. QTLs and epistasis for seminal root length under a different water supply in rice (*Oryza sativa* L.). *Theoretical Applied Genetics* 103, 118–123.
- Zheng, B.S., Yang, L., Zhang, W.P., Mao, C.Z., Wu, Y.R., Yi, K.K., Liu, F.Y., Wu, P., 2003. Mapping QTLs and candidate genes for rice root traits under different water supply conditions and comparative analysis across three populations. *Theoretical Applied Genetics* 107, 1505–1515.
- Zheng, H.G., Babu, R.C., Pathan, M.S., Ali, L., Huang, N., Courtois, B., Nguyen, H.T., 2000. Quantitative trait loci for root-penetration ability and root thickness in rice: comparison of genetic backgrounds. *Genome* 43, 53–61.
- Zou, G.H., Mei, H.W., Liu, H.Y., Liu, G.L., Hu, S.P., Yu, X.Q., Li, M.S., Wu, J.H., Luo, L.J., 2005. Grain yield responses to moisture regimes in a rice population: association among traits and genetic markers. *Theoretical Applied Genetics* 112, 106–113.
